# Supplementary material for: Spatial Patterns and Characteristics of Flood Seasonality in Europe
Source: Copernicus journal article supplement (doi:10.5194/hess-2017-649), 2017-11-15
Supplement: Supplementary file 1 [file hess-2017-649-supplement.pdf]

# Spatial Patterns and Characteristics of Flood Seasonality in Europe

Julia Hall<sup>1</sup> and Günter Blöschl<sup>1</sup>

<sup>1</sup>Institute of Hydraulic Engineering and Water Resources Management, Technische Universität Wien, Vienna, Austria

## Supplement:

Data Sources of the database used in this study and their respective data holders

| <b>Data Source Country/Project</b> | <b>Data Holder/Source/Project information</b>                                                                                |
|------------------------------------|------------------------------------------------------------------------------------------------------------------------------|
| Albania                            | National Hydro-Meteorological Service Albania, Institute of GeoSciences, Energy, Water and Environment (IGEWE)               |
| Austria                            | Hydrographic Services of Austria (HZB), Austrian Federal Ministry of Agriculture, Forestry, Environment and Water Management |
| Bosnia and Herzegovina             | Hydrological Yearbooks of the former Republic of Yugoslavia                                                                  |
| Bulgaria                           | Hydrological Yearbooks of the Rivers in Bulgaria, National Institute of Meteorology and Hydrology                            |
| Croatia                            | Meteorological and Hydrological Service of Croatia (DHMZ)                                                                    |
| Czechia                            | Czech Hydrometeorological Institute                                                                                          |
| Denmark                            | Freshwater Scientific Data Centre, Danish Centre for Environment and Energy (DCE)                                            |
| Estonia                            | Estonian Environment Agency (KAUR)                                                                                           |
| EWA                                | European Water Archive (EWA)                                                                                                 |
| Finland                            | Finnish Environment Institute, Open information/Hydrology/Discharge(SYKE)                                                    |
| France                             | HYDRO database, French Ministry of Ecology, Sustainable Development and Energy                                               |
| Germany                            | Federal Waterways and Shipping Administration (WSV)                                                                          |
| Germany, Bavaria                   | Bavarian Environment Agency (LfU)                                                                                            |
| Germany, Brandenburg               | Brandenburg State Office of Environment, Health and Consumer Protection (LUGV)                                               |
| Germany, Hesse                     | Hessian Agency for Nature Conservation, Environment and Geology (HLNUG)                                                      |
| Germany, Lower Saxony              | Lower Saxony Water Management, Coastal Defence and Nature Conservation Agency (NLWKN)                                        |
| Germany, Mecklenburg-Vorpommern    | State Office of Environment, Nature Protection and Geology of Mecklenburg-Vorpommern (LUNG)                                  |
| Germany, North Rhine-Westphalia    | North Rhine-Westphalia State Agency for Nature, Environment and Consumer Protection (LANUV),                                 |
| Germany, Rhineland-Palatinate      | State Office for the Environment (LfU), Rhineland-Palatinate                                                                 |
| Germany, Saarland                  | The Saarland State Office for Environmental and Labour Protection (LUA)                                                      |
| Germany, Saxony                    | Saxon State Agency for Environment, Agriculture and Geology (LfULG)                                                          |
| Germany, Saxony-Anhalt             | State Agency for Flood Defence and Water Management of Saxony-Anhalt (LHW)                                                   |
| Germany, Schleswig-Holstein        | Schleswig-Holstein Agency for Coastal Defence, National Park and Marine Conservation (ACNM-SH)                               |
| Germany, Thuringia                 | Thuringian State Institute for the Environment and Geology (TLUG)                                                            |
| GRDC                               | The Global Runoff Data Centre, Koblenz, Germany                                                                              |
| Greece                             | Hydroscope- Ministry for the Environment, Energy and Climate Change - Special Secretariat for Water                          |

---

|                                    |                                                                                                                    |
|------------------------------------|--------------------------------------------------------------------------------------------------------------------|
| Hungary                            | General Directorate of Water Management, Hungary                                                                   |
| Hungary                            | Lower Tisza District Water Directorate                                                                             |
| HYDRATE                            | HYDRATE Project data base: Hydrometeorological Data Resources and Technology for Effective Flash Flood Forecasting |
| Ireland                            | Irish Environmental Protection Agency (EPA)                                                                        |
| Ireland                            | Office of Public Works (OPW)                                                                                       |
| Italy                              | Former National Hydrographic Service (SIMN)                                                                        |
| Italy                              | The Italian National Institute for Environmental Protection and Research (ISPRA)                                   |
| Italy                              | National Research Council (CNR)                                                                                    |
| Italy, Bolzano, South Tyrol Region | Hydrological Services, Autonomous Province of Bozen/Bolzano - South Tyrol                                          |
| Italy, Emilia-Romagna Region       | Regional Agency for the Environmental Protection (ARPA), Emilia-Romagna                                            |
| Italy, Lazio & Umbria              | Bencivenga M., Calenda G. and Mancini C.P., 2001.                                                                  |
| Italy, Piedmont Region             | Italian National Agency for Electricity (ENEL)                                                                     |
| Italy, Piedmont Region             | Research Institute for Hydro-Geologic Protection (IRPI)                                                            |
| Italy, Piedmont Region             | Regional Agency for the Environmental Protection (ARPA), Piemonte                                                  |
| Italy, Po Region                   | Basin Authority of the Po River                                                                                    |
| Italy, Sicily Region               | Water Observatory - Sicily Region                                                                                  |
| Italy, Trentino Region             | Civil Protection Department, Autonomous Province of Trento                                                         |
| Italy, Tuscany Region              | Regional Functional Centre of Meteo-Hydrological Monitoring, Tuscany                                               |
| Italy, Veneto Region               | Regional Agency for the Environmental Protection (ARPA), Veneto                                                    |
| Latvia                             | Latvian Environment, Geology and Meteorology Centre                                                                |
| Lithuania                          | Lithuanian Hydrometeorological Service under the Ministry of Environment                                           |
| Netherlands                        | Dutch Ministry of Infrastructure and the Environment - Rijkswaterstaat                                             |
| Norway                             | Database Hydra II; Norwegian Water Resources and Energy Directorate (NVE)                                          |
| Poland                             | Institute of Meteorology and Water Management National Research Institute (IMGW-PIB)                               |
| Portugal                           | Portuguese Environmental Agency National Information System for Water Resources of Portugal (SNIRH)                |
| Republic of Macedonia              | National Hydrometeorological Service, Republic of Macedonia                                                        |
| Russia                             | Ministry of Natural Resources and Ecology of the Russian Federation                                                |
| Russia                             | State Water Cadastre, State Hydrological Institute, Lomonosov Moscow State University                              |
| Russia                             | AIS GMVO, Russian Federal Agency for Water Resources                                                               |
| Serbia                             | Republic Hydrometeorological Service of Serbia (RHSS)                                                              |
| Slovakia                           | Slovak Hydrometeorological Institute, Bratislava (SHMI)                                                            |
| Slovenia                           | Slovenian Environment Agency (ARSO)                                                                                |
| Spain                              | Centre for Hydrographic Studies of CEDEX, Ministry of Agriculture, Food and Environment, Spain                     |
| Sweden                             | Swedish Meteorological and Hydrological Institute (SMHI)                                                           |
| Switzerland                        | Federal Office for the Environment (BAFU)                                                                          |
| Turkey                             | General Directorate of Electrical Power Resources Survey and Development Administration (EIE), Turkey              |
| Ukraine                            | Hydrological Department, Ukrainian Hydrometeorological Institute (UHMI)                                            |
| Ukraine                            | Hydrometeorological Institute, Odessa State Environmental University (OSENU)                                       |
| United Kingdom                     | UK National River Flow Archive (NRFA)                                                                              |

---
